# Supplementary material for: Analog regulation of metabolic demand
Source: Springer Nature journal article supplement (doi:10.1186/1752-0509-5-40), 2011-03-15

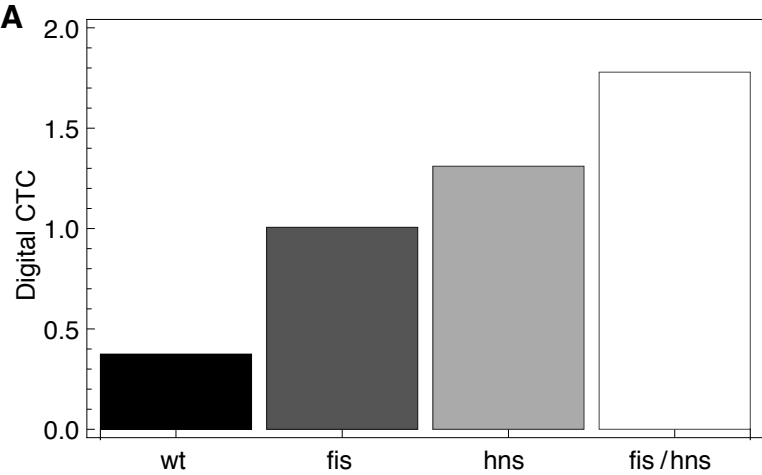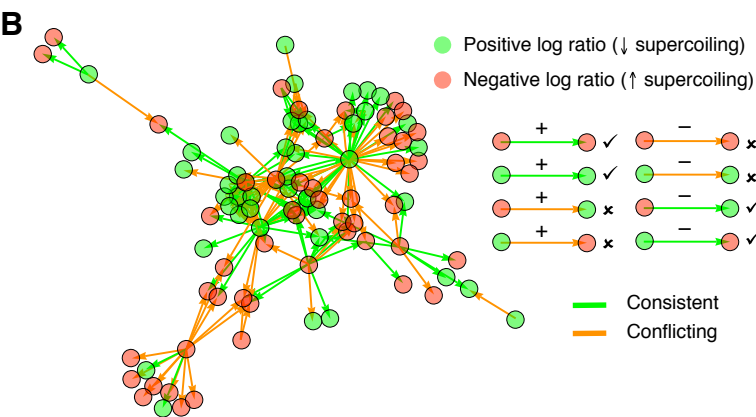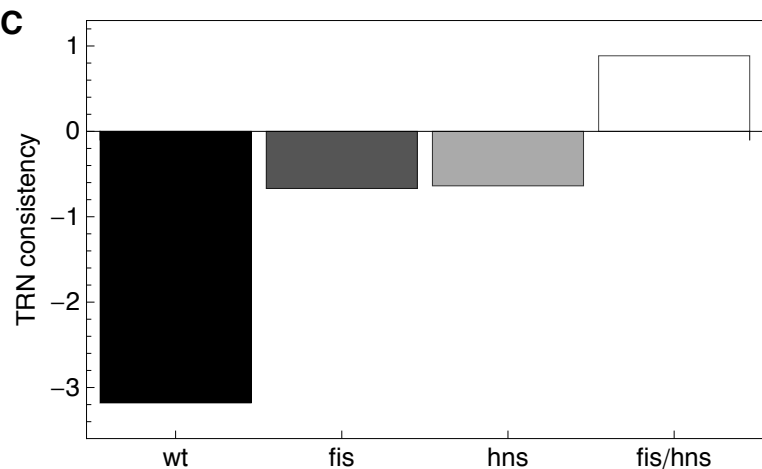

Supplement: 12918_2010_631_MOESM8_ESM.pdf [file 12918_2010_631_MOESM8_ESM.pdf]
